# Supplementary material
Source: ML conference proceedings conference paper supplement (https://openaccess.thecvf.com/content/CVPR2024/html/Wang_Neural_Modes_Self-supervised_CVPR_2024_paper.html)
Supplement: Supplementary file 1 [file Wang_Neural_Modes_Self-supervised_CVPR_2024_supplemental.pdf]

# Neural Modes: Self-supervised Learning of Nonlinear Modal Subspaces

## Appendix

### A. Additional Tables and Figures

Table A1. Analysis of nodal forces on the square sheet example. We compute L1 and L2 norms of nodal forces  $F$  and corresponding errors  $\Delta F$  with respect to ground truth. The norms are normalized with respect to batch size.

| Method ( $\times 10^4$ ) | $\ \Delta F\ _1$ | $\ \Delta F\ _2$ | $\ F\ _1$  | $\ F\ _2$ |
|--------------------------|------------------|------------------|------------|-----------|
| PCA+AE                   | 111              | 5.95             | 279        | 24        |
| PCA+AE (grid)            | 83               | 4.35             | 250        | 22        |
| L2 Supervised            | 125              | 6.59             | 293        | 24        |
| Neural Modes (stoch.)    | <b>31</b>        | <b>0.93</b>      | <b>199</b> | <b>19</b> |
| Neural Modes (grid)      | <b>25</b>        | <b>0.74</b>      | <b>193</b> | <b>19</b> |

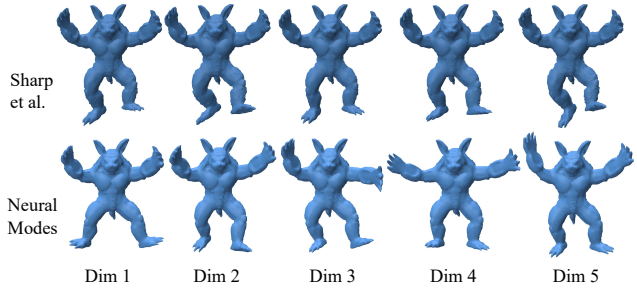

Figure A3. Visualization of Armadillo subspace ( $d = 5$ )

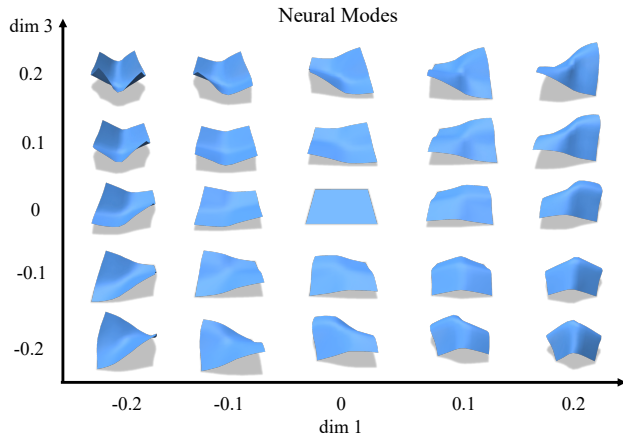

Figure A1. Visualization of a two-dimensional Neural Modes slice for the square sheet example.

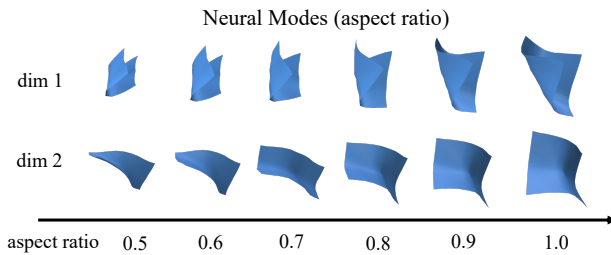

Figure A2. Visualization of Neural Modes for a rectangular sheet conditioned on different side length ratios.
